# Supplementary material
Source: Research Square preprint supplement (doi:10.21203/rs.3.rs-8911228/v1)
Supplement: Supplementary file 1 [file c66269de4e18eb1d2492a14b.docx]

**Supplementary Figure**

**Fig. S1. Distribution of changes in Numerical Rating Scale (ΔNRS; During − Pre) across neuropathic pain types.**
Each point represents an individual stimulation session. Boxplots indicate the median and interquartile range; whiskers extend to 1.5 × the interquartile range, with individual points representing all sessions. Session counts are shown in parentheses for each pain type. No clear differences in ΔNRS were observed among trigeminal, spinal, and peripheral neuropathic pain types, consistent with session-level linear mixed-effects models and subject-level aggregated analyses.
